# Supplementary material for: Global hydrological droughts in the 21st century under a changing hydrological regime
Source: Copernicus journal article supplement (doi:10.5194/esd-6-1-2015), 2015-01-06
Supplement: Supplementary file 1 [file esd-6-1-2015-supplement-cover-letter.pdf › esd-6-1-2015-supplement-cover-letter.pdf]

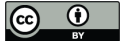

## *Supplement of*

# **Global hydrological droughts in the 21st century under a changing hydrological regime**

**N. Wanders et al.**

*Correspondence to:* N. Wanders ([n.wanders@uu.nl](mailto:n.wanders@uu.nl))

- [esd-6-1-2015-supplement-cover-letter.pdf](#)
- [majorClimate.avi](#)
- [subClimate.avi](#)
